# Supplementary material for: Profile and Content of Phenolic Compounds in Leaves, Flowers, Roots, and Stalks of Sanguisorba officinalis L. Determined with the LC-DAD-ESI-QTOF-MS/MS Analysis and Their In Vitro Antioxidant, Antidiabetic, Antiproliferative Potency
Source: PubMed Central journal article supplement (PMC7464974; doi:10.3390/ph13080191), 2020-08-12
Supplement: pharmaceuticals-13-00191-s001.pdf [file pharmaceuticals-13-00191-s001.pdf]

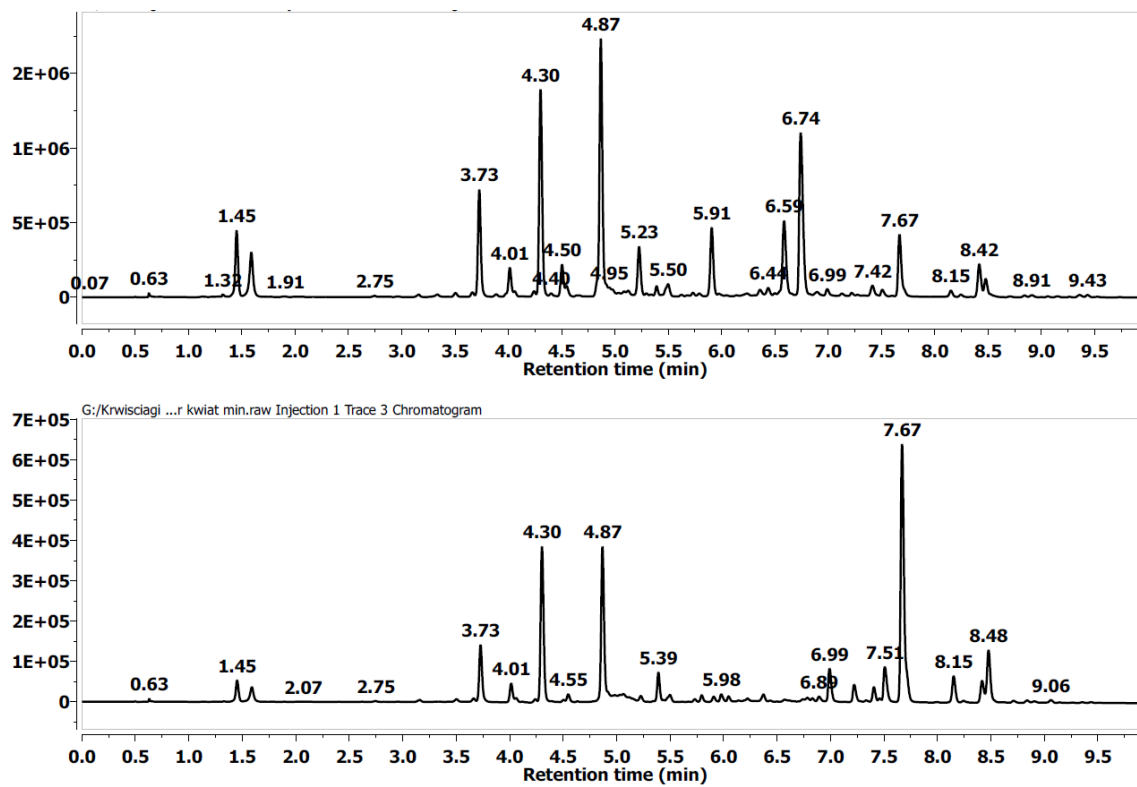

**Figure S1.** LC-DAD-ESI-QTOF-MS/MS chromatogram fragile of the *Sanguisorba officinalis* L. flowers extract at 320 and 360 nm.

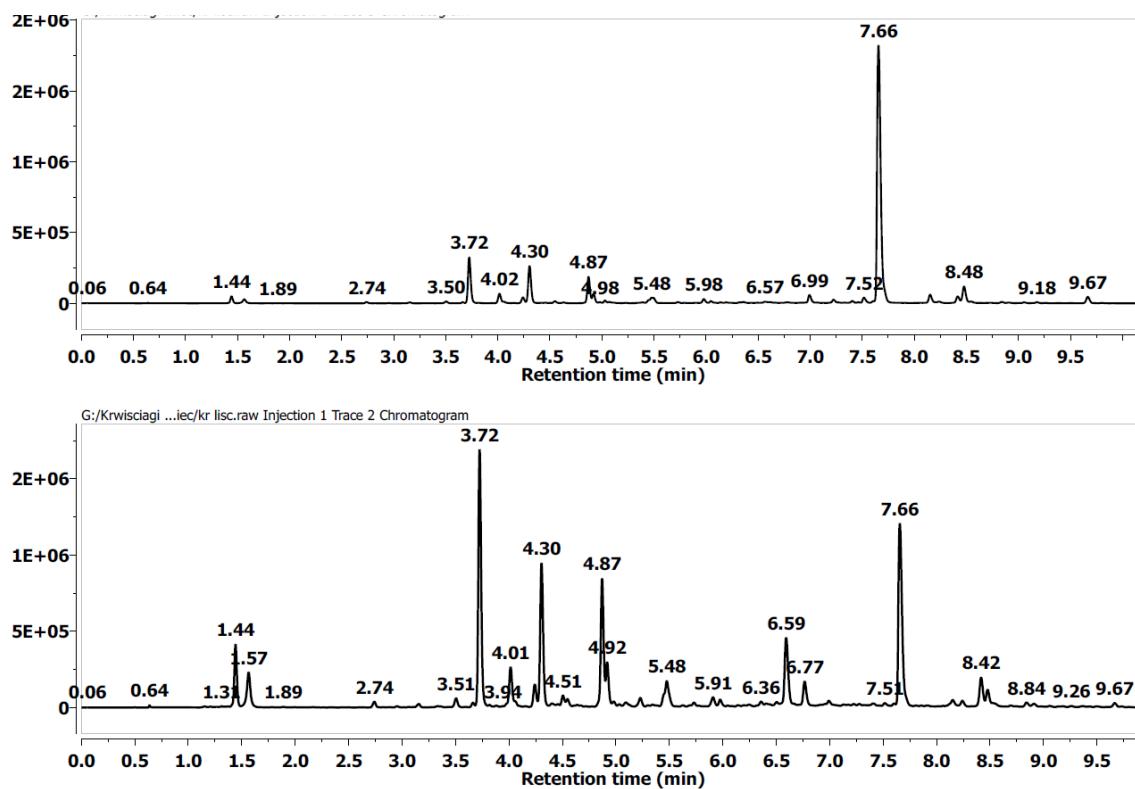

**Figure S2.** LC-DAD-ESI-QTOF-MS/MS chromatogram fragile of the *Sanguisorba officinalis* L. leaves extract at 320 and 360 nm.

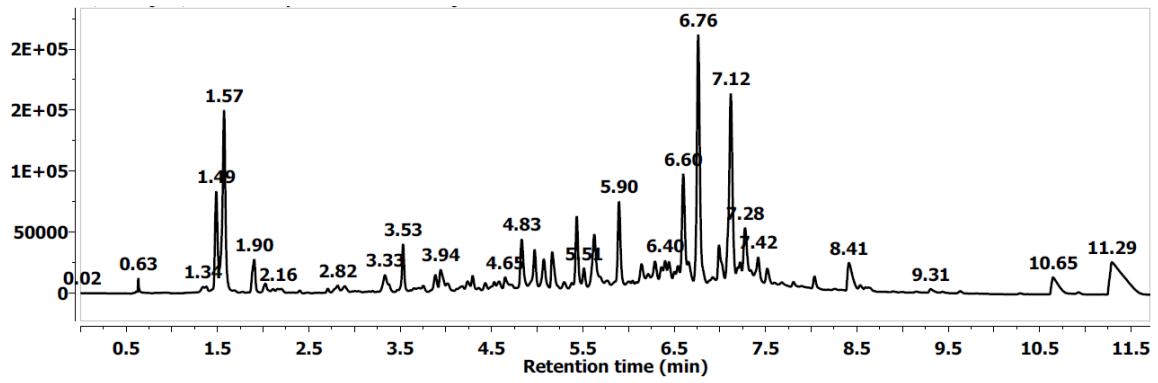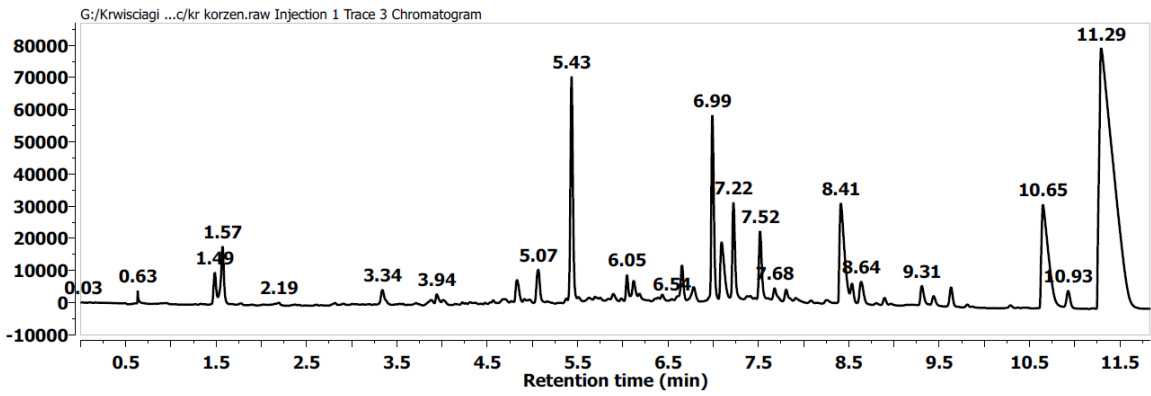

**Figure S3.** LC-DAD-ESI-QTOF-MS/MS chromatogram fragile of the *Sanguisorba officinalis* L. roots extract at 320 and 360 nm.

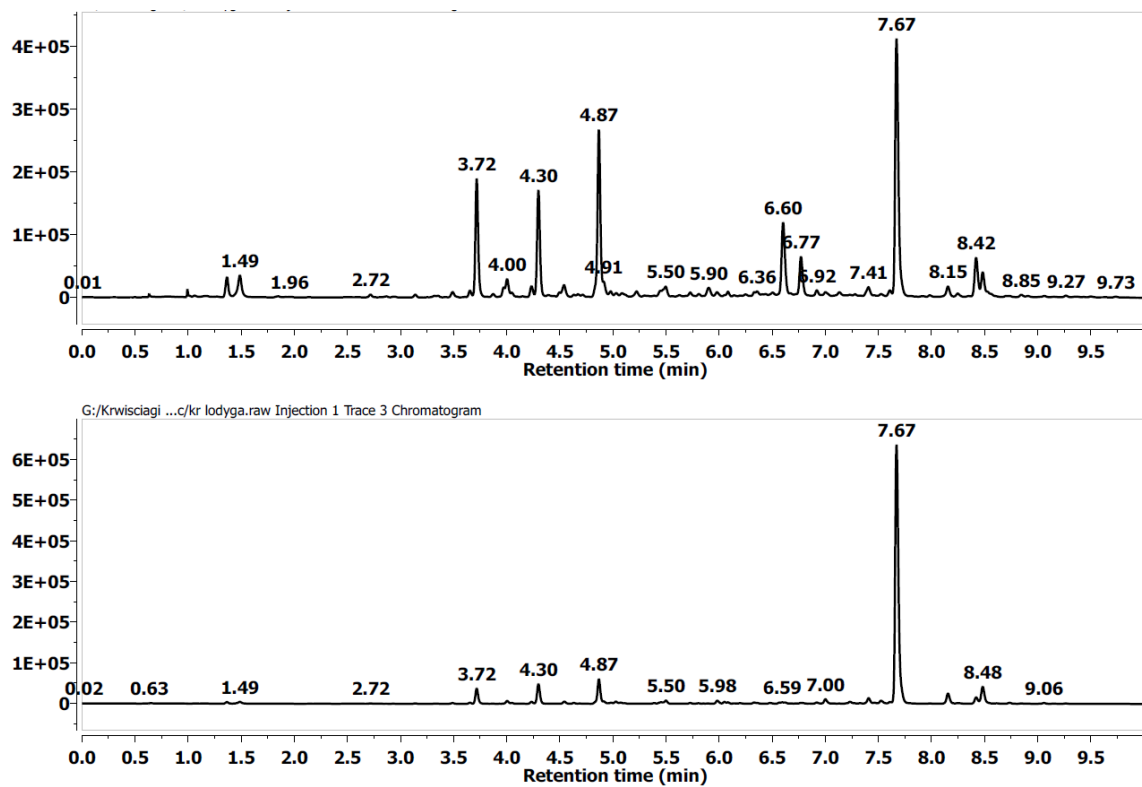

**Figure S4.** LC-DAD-ESI-QTOF-MS/MS chromatogram fragile of the *Sanguisorba officinalis* L. stalks extract at 320 and 360 nm.
